# Supplementary material for: Uniform-embeddable-distributed Ni3S2 cocatalyst inside and outside a sheet-like ZnIn2S4 photocatalyst for boosting photocatalytic hydrogen evolution
Source: Royal Society of Chemistry journal article supplement (doi:10.1039/d2nr05207e), 2022-01-01
Supplement: d2nr05207e1.pdf [file d2nr05207e1.pdf]

## Electronic Supplementary Information

### **Uniform-embeddable-distributed Ni<sub>3</sub>S<sub>2</sub> cocatalyst inside and outside of sheet-like ZnIn<sub>2</sub>S<sub>4</sub> photocatalyst for boosting photocatalytic hydrogen evolution**

Bo Lin, Xin Ren, Zihao Chen, Hang Xiao, Baorong Xu, Guidong Yang\*

*XJTU-Oxford International Joint Laboratory for Catalysis, School of Chemical Engineering and Technology, Xi'an Jiaotong University, Xi'an 710049, China*

## Results

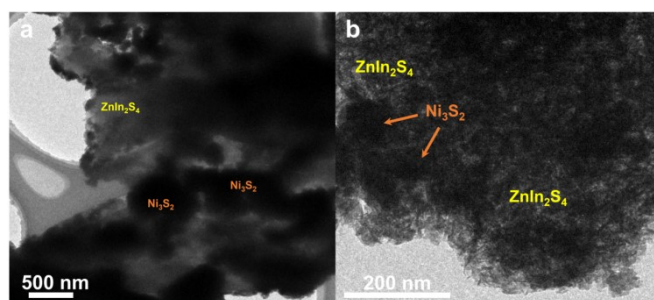

**Fig. S1.** TEM images of (a) TSLNiS/ZIS and (b) UEDNiS/ZIS.

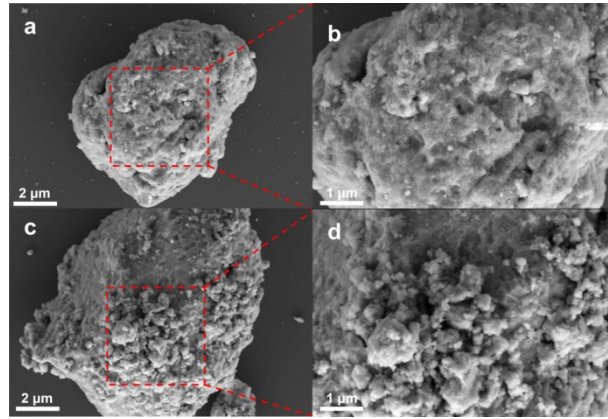

**Fig. S2.** SEM images of (a, b) TSLNiS/ZIS and (c, d) UEDNiS/ZIS.

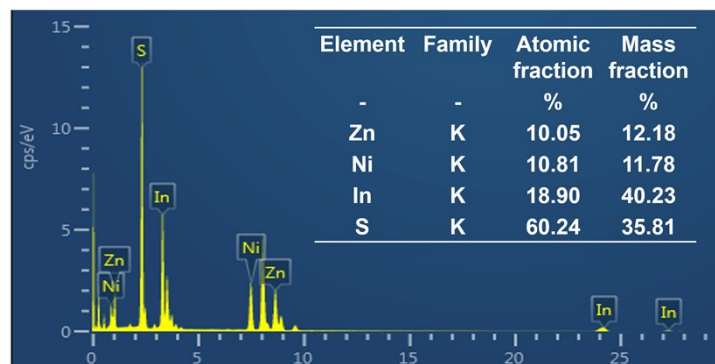

**Fig. S3.** EDX image of TSLNiS/ZIS. The unmarked signal peaks are corresponded to the C and Cu elements in the carbon-supported copper net used to load the samples in Mapping tests.

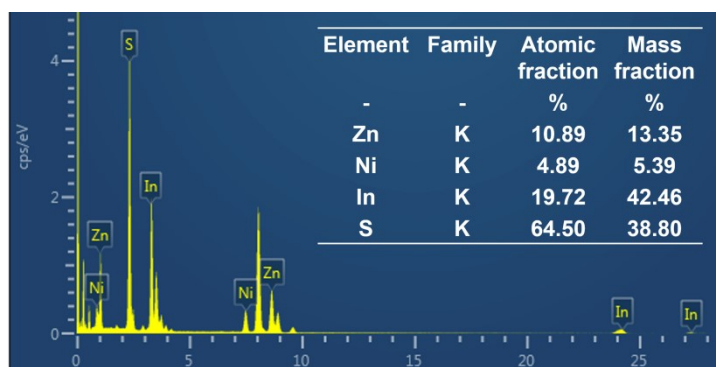

**Fig. S4.** EDX image of UEDNiS/ZIS. The unmarked signal peaks are corresponded to the C and Cu elements in the carbon-supported copper net used to load the samples in Mapping tests.

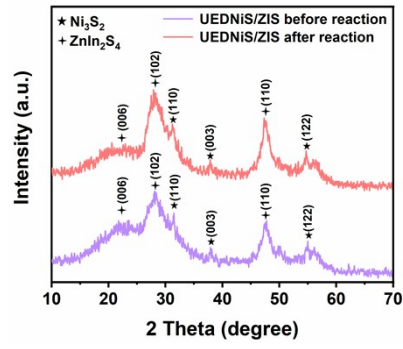

**Fig. S5.** XRD patterns of fresh UEDNiS/ZIS and UEDNiS/ZIS after 3 cycling tests.

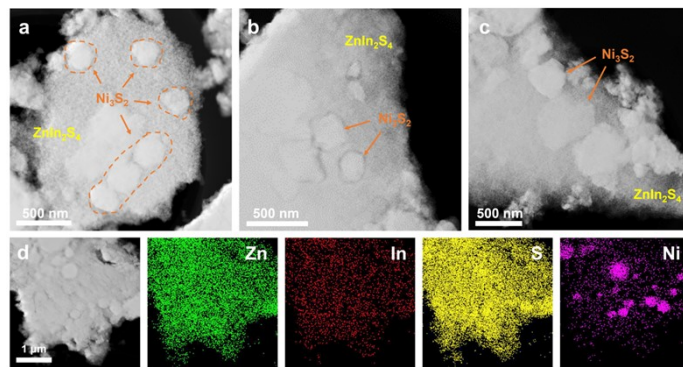

**Fig. S6.** (a-c) HAADF-STEM and (d) corresponding elemental mapping images of the recycled UEDNiS/ZIS after 3th photoreactions within 24 h.

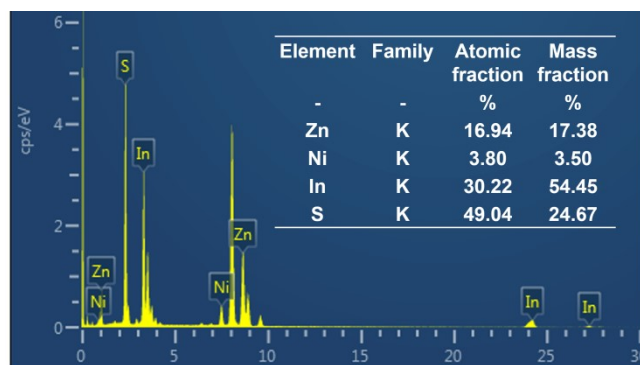

**Fig. S7.** EDX image of the recycled UEDNiS/ZIS. The unmarked signal peaks are corresponded to the C and Cu elements in the carbon-supported copper net used to load the samples in Mapping tests.



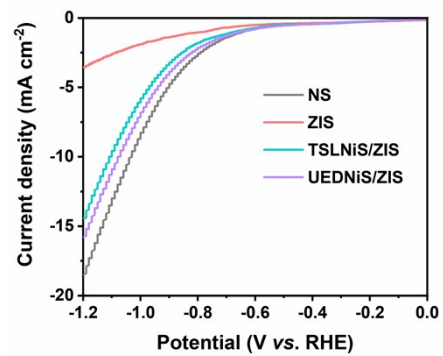

**Fig. S8.** The LSV curves of UEDNiS/ZIS, TSLNiS/ZIS, ZIS and NS.

**Table S1.** Detailed surface areas and pore volume of UEDNiS/ZIS and TSLNiS/ZIS.

| <b>Samples</b> | <b>BET Surface Area<br/>(m<sup>2</sup> g<sup>-1</sup>)</b> | <b>Pore Volume<br/>(cm<sup>3</sup> g<sup>-1</sup>)</b> | <b>Average pore size<br/>(nm)</b> |
|----------------|------------------------------------------------------------|--------------------------------------------------------|-----------------------------------|
| UEDNiS/ZIS     | 51.58                                                      | 0.09                                                   | 4.90                              |
| TSLNiS/ZIS     | 6.28                                                       | 0.02                                                   | 5.76                              |
